# Supplementary material for: Purification of Maize Nucleotide Pyrophosphatase/Phosphodiesterase Casts Doubt on the Existence of Zeatin Cis–Trans Isomerase in Plants
Source: PubMed Central journal article supplement (PMC5572937; doi:10.3389/fpls.2017.01473), 2017-08-23

*Supplementary Material*

**Purification of maize nucleotide pyrophosphatase/phosphodiesterase casts doubt on the existence of zeatin *cis-trans* isomerase in plants**

Tomáš Hluska, Marek Šebela, René Lenobel, Ivo Frébort, Petr Galuszka

Correspondence: [petr.galuszka@upol.cz](mailto:petr.galuszka@upol.cz)

**Supplementary Figure S1.** Typical UFLC chromatograms of enzymatic reactions. (A) shows the reaction of *cis*-zeatin isomerization with FAD at 0.75 min, FMN at 1.30 min, tZ at 1.55 min and cZ at 1.95 min. (B) shows typical chromatogram of FAD hydrolysis with FMN peak at 3.15 min and FAD at 3.65 min. Blue line indicates gradient of methanol, green line pressure in UFLC system, purple and black line absorbance at 268 and 449 nm, respectively.

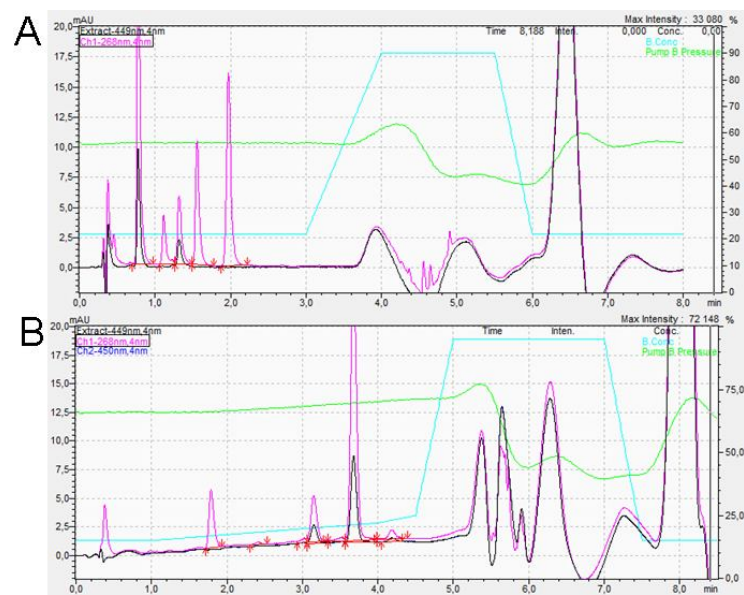

## Zeatin *cis-trans* Isomerase Uncovered

**Supplementary Figure S2.** Results of MALDI-TOF/TOF MS identification of protein band with zeatin *cis-trans* isomerase activity.

**Protein 1:** LOC100280465 [Zea mays]  
**Accession:** gil226531542 **Score:** 131.00  
**Database:** NCBI nr **MW [kDa]:** 51.10  
**Seq. Coverage [%]:** 32.30 % **pl:** 6.39  
**No. of Peptides:** 19

**Modification(s):** Carbamidomethyl, Oxidation

|            |            |            |            |            |             |            |            |            |            |            |            |
|------------|------------|------------|------------|------------|-------------|------------|------------|------------|------------|------------|------------|
| 10         | 20         | 30         | 40         | 50         | 60          | 70         | 80         | 90         | 100        | 110        | 120        |
| MASPPHSVEV | RTPGDSRPT  | AALLSPSVAA | PQPSNASRLL | LLLTAAVAAA | TAFVLLRPPI  | TVVTAASATA | RPLSKLSKPV | VLLISSDGFR | FGYQYKAPLP | HIRRLFANGT | SAEGLIPVF  |
| 130        | 140        | 150        | 160        | 170        | 180         | 190        | 200        | 210        | 220        | 230        | 240        |
| PTLTFNHYS  | IVTGLYPSSH | GIINNYFPDP | ISGDYFTMKN | HDPKWWLGEF | LWATAAAQGV  | LSATFFWEGS | EVTKGSWNCP | DKYCRHYNGS | VPFEERVDTI | LGYFDLPNQ  | MPQFMTLYFE |
| 250        | 260        | 270        | 280        | 290        | 300         | 310        | 320        | 330        | 340        | 350        | 360        |
| DPDHQGHQVG | PDDPSITDAV | VHIDEMLGR  | IAGLEARGMF | EDVNIILVGD | HGMVGTCDRK  | LVFLEELAPW | IELKSDWVLS | VTPLLAIRPP | DGVSPAEVVA | KMNEGLGSGK | VKNGEYLKMY |
| 370        | 380        | 390        | 400        | 410        | 420         | 430        | 440        | 450        | 460        | 470        |            |
| LKEELPTLH  | YSESYRIPPI | IGLVGEGYKI | EMRKRKNEC  | GGAHGYDNAF | FSMRTIFAHAH | GPRFQGGRTV | PSFENAEIYN | VMASILNLKP | APNNGSASFP | GTILLPNK   |            |

| m/z meas. | Δ m/z [ppm] | z | P | Range   | Sequence                    | Modification        |
|-----------|-------------|---|---|---------|-----------------------------|---------------------|
| 1630.9577 | 3.102       | 1 | 0 | 76-90   | LSKPVVLLISSDGFR             |                     |
| 805.3849  | -3.721      | 1 | 0 | 91-96   | FGYQYK                      |                     |
| 1589.8623 | 2.282       | 1 | 1 | 91-103  | FGYQYKAPLPHIR               |                     |
| 803.4890  | 0.4263      | 1 | 0 | 97-103  | APLPHIR                     |                     |
| 1442.5965 | 1.727       | 1 | 1 | 195-205 | GSWNCPDKYCR                 | Carbamidomethyl: 10 |
| 842.5132  | 4.535       | 1 | 0 | 270-277 | IAGLEAR                     |                     |
| 1828.0556 | -3.451      | 1 | 1 | 300-314 | KLVFLEELAPWIELK             |                     |
| 2816.5555 | -0.07056    | 1 | 0 | 315-341 | SDWVLSVTPLLAIRPPDGVSPAEEVAK |                     |
| 1279.6700 | -1.122      | 1 | 1 | 359-368 | MYLKEELPTR                  |                     |
| 1295.6715 | 3.933       | 1 | 1 | 359-368 | MYLKEELPTR                  | Oxidation: 1        |
| 1054.4965 | 1.202       | 1 | 0 | 369-376 | LHYSESYR                    |                     |
| 2391.2725 | 0.7624      | 1 | 1 | 369-389 | LHYSESYRIPPIIGLVGEGYK       |                     |
| 1355.7942 | 0.6609      | 1 | 0 | 377-389 | IPPIIGLVGEGYK               |                     |
| 1857.0556 | 0.1071      | 1 | 1 | 377-393 | IPPIIGLVGEGYKIEMK           |                     |
| 1873.0493 | -0.5566     | 1 | 1 | 377-393 | IPPIIGLVGEGYKIEMK           | Oxidation: 16       |
| 2088.8738 | -1.189      | 1 | 1 | 397-414 | RNECGGAHGYDNAFFSMR          | Carbamidomethyl: 4  |
| 1932.7761 | 0.4818      | 1 | 0 | 398-414 | NECGGAHGYDNAFFSMR           | Carbamidomethyl: 3  |

| m/z meas. | Δ m/z [ppm] | z | P | Range   | Sequence          | Modification                      |
|-----------|-------------|---|---|---------|-------------------|-----------------------------------|
| 1948.7639 | -3.170      | 1 | 0 | 398-414 | NECGGAHGYDNAFFSMR | Carbamidomethyl: 3; Oxidation: 16 |
| 969.5245  | -1.992      | 1 | 0 | 415-423 | TIFAHAHGR         |                                   |

## Zeatin *cis-trans* Isomerase Uncovered

**Supplementary Figure S3.** Results of MALDI-TOF-TOF MS/MS identification of protein band with zeatin *cis-trans* isomerase activity.

Protein 1: LOC100280465 [Zea mays]  
 Accession: gj|226531542      Score: 1345.46  
 Database: NCBIInr      MW [kDa]: 51.10  
 Seq. Coverage [%]: 29.10 %      pI: 6.39  
 Modification(s): Carbamidomethyl, Oxidation      No. of Peptides: 19

|            |            |            |            |            |            |            |            |            |            |            |            |
|------------|------------|------------|------------|------------|------------|------------|------------|------------|------------|------------|------------|
| 10         | 20         | 30         | 40         | 50         | 60         | 70         | 80         | 90         | 100        | 110        | 120        |
| MASPPHSVEV | RTPGDSRPT  | AALLSPSVA  | QPSNASRLL  | LLTAAVAA   | TAFVLLRPPI | TVVTAASATA | RPLSKLSKPV | VLLISSDGFR | FGYQYKAPLP | HIRRLFANGT | SAEGLIPVF  |
| 130        | 140        | 150        | 160        | 170        | 180        | 190        | 200        | 210        | 220        | 230        | 240        |
| PTLTFPNHYS | IVTGLYPSSH | GIINNYFPDP | ISGDYFTMKN | HDPKWWLGEP | LWATAAAQGV | LSATFFWPGS | EVTKGSWNC  | DKYCRHYNGS | VPFEERVDTI | LGYFDLPPNQ | MPQFMTLYFE |
| 250        | 260        | 270        | 280        | 290        | 300        | 310        | 320        | 330        | 340        | 350        | 360        |
| DPDHQGHQVG | FDDPSITDAV | VHIDEMLGR  | IAGLEARGMF | EDVNIILVGD | HGMVGTCDRK | LVFLEELAPW | IELKSDWVLS | VTPLLAIRPP | DGVSPAEEVA | KMNEGLGSGK | VRNGEYLKMY |
| 370        | 380        | 390        | 400        | 410        | 420        | 430        | 440        | 450        | 460        | 470        |            |
| LKEELPTRLH | YSESYRIPPI | IGLVGEGYKI | EMKRSKRNEC | GGAHGYDNAF | FSMRTIFAAH | GPRFQGGRTV | PSFENAEIYN | VMAIILNLKP | APNNGSASFP | GTILLPNK   |            |

| Cmpd. | No. of Cmpds. | m/z meas. | $\Delta$ m/z [ppm] | z | Rt [min] | Score | P | Range   | Sequence                         | Modification           |
|-------|---------------|-----------|--------------------|---|----------|-------|---|---------|----------------------------------|------------------------|
|       | 1             | 1759.0511 | 1.99               | 1 |          | 130.9 | 0 | 75-90   | S.KLSKPVVLLISSDGFR.F             |                        |
|       | 1             | 1630.9552 | 1.57               | 1 |          | 131.8 | 0 | 76-90   | K.LSKPVVLLISSDGFR.F              |                        |
|       | 1             | 1302.7463 | 3.59               | 1 |          | 37.6  | 0 | 79-90   | K.PVVLLISSDGFR.F                 |                        |
|       | 1             | 1589.8526 | -3.87              | 1 |          | 23.3  | 0 | 91-103  | R.FGYQYKAPLPHIR.R                |                        |
|       | 1             | 803.4888  | 0.19               | 1 |          | 43.7  | 0 | 97-103  | K.APLPHIR.R                      |                        |
|       | 1             | 1442.5953 | 0.92               | 1 |          | 57.6  | 0 | 195-205 | K.GSWNCPDKYCR.H                  | Carbamidomethyl: 5, 10 |
|       | 1             | 842.5075  | -2.30              | 1 |          | 58.0  | 0 | 270-277 | R.LIAGLEAR.G                     |                        |
|       | 1             | 2816.5538 | -0.66              | 1 |          | 112.1 | 0 | 315-341 | K.SDWVLSVTPLLAIRPPDGVSPAEEVVAK.M |                        |
|       | 1             | 1718.9823 | 1.36               | 1 |          | 73.0  | 0 | 325-341 | L.LAIRPPDGVSPAEEVVAK.M           |                        |
|       | 1             | 1279.6730 | 1.17               | 1 |          | 66.8  | 0 | 359-368 | K.MYLKEELPTR.L                   |                        |
|       | 1             | 1295.6672 | 0.60               | 1 |          | 51.0  | 0 | 359-368 | K.MYLKEELPTR.L                   | Oxidation: 1           |
|       | 1             | 1054.4941 | -1.05              | 1 |          | 68.9  | 0 | 369-376 | R.LHYSES.YR.I                    |                        |

| Cmpd. | No. of Cmpds. | m/z meas. | $\Delta$ m/z [ppm] | z | Rt [min] | Score | P | Range   | Sequence               | Modification                      |
|-------|---------------|-----------|--------------------|---|----------|-------|---|---------|------------------------|-----------------------------------|
|       | 1             | 1355.7946 | 0.94               | 1 |          | 90.9  | 0 | 377-389 | R.IPPIIGLVGEGYK.I      |                                   |
|       | 1             | 1873.0452 | -2.73              | 1 |          | 37.7  | 0 | 377-393 | R.IPPIIGLVGEGYK.IEMK.R | Oxidation: 16                     |
|       | 1             | 1857.0562 | 0.43               | 1 |          | 74.5  | 0 | 377-393 | R.IPPIIGLVGEGYK.IEMK.R |                                   |
|       | 1             | 1932.7772 | 1.05               | 1 |          | 109.7 | 0 | 398-414 | R.NECCGAHGYDNAFFSMR.T  | Carbamidomethyl: 3                |
|       | 1             | 1948.7717 | 0.80               | 1 |          | 45.7  | 0 | 398-414 | R.NECCGAHGYDNAFFSMR.T  | Carbamidomethyl: 3; Oxidation: 16 |
|       | 1             | 1472.6410 | 2.31               | 1 |          | 46.2  | 0 | 402-414 | G.GAHGYDNAFFSMR.T      |                                   |
|       | 1             | 969.5270  | 0.52               | 1 |          | 70.2  | 0 | 415-423 | R.TIFAAHGPR.F          |                                   |

## Zeatin *cis-trans* Isomerase Uncovered

**Supplementary Figure S4.** Alignment of plant nucleotide pyrophosphate/phosphodiesterase protein sequences. Identical and similar amino acids are shaded in black and gray, respectively. Amino acids important for substrate binding are marked with asterisk (\*): Phe 125, Asn 145, Trp 187 (part of WPG motif), Glu 191 (that is homologous to Asp 308 in mouse NPP1), Tyr 207 and Asp 243. Asparagine residues predicted to be glycosylated are marked with #: Asn 108, Asn 208, Asn 454 and asparagine in AtNPP2 to 4 corresponding to Lys 393; asparagine residues 35, 33 and 34 in ZmNPP1, AtNPP1 and AtNPP2 are not marked. Predicted signal peptides giving a reliable prediction are shaded with dark blue.

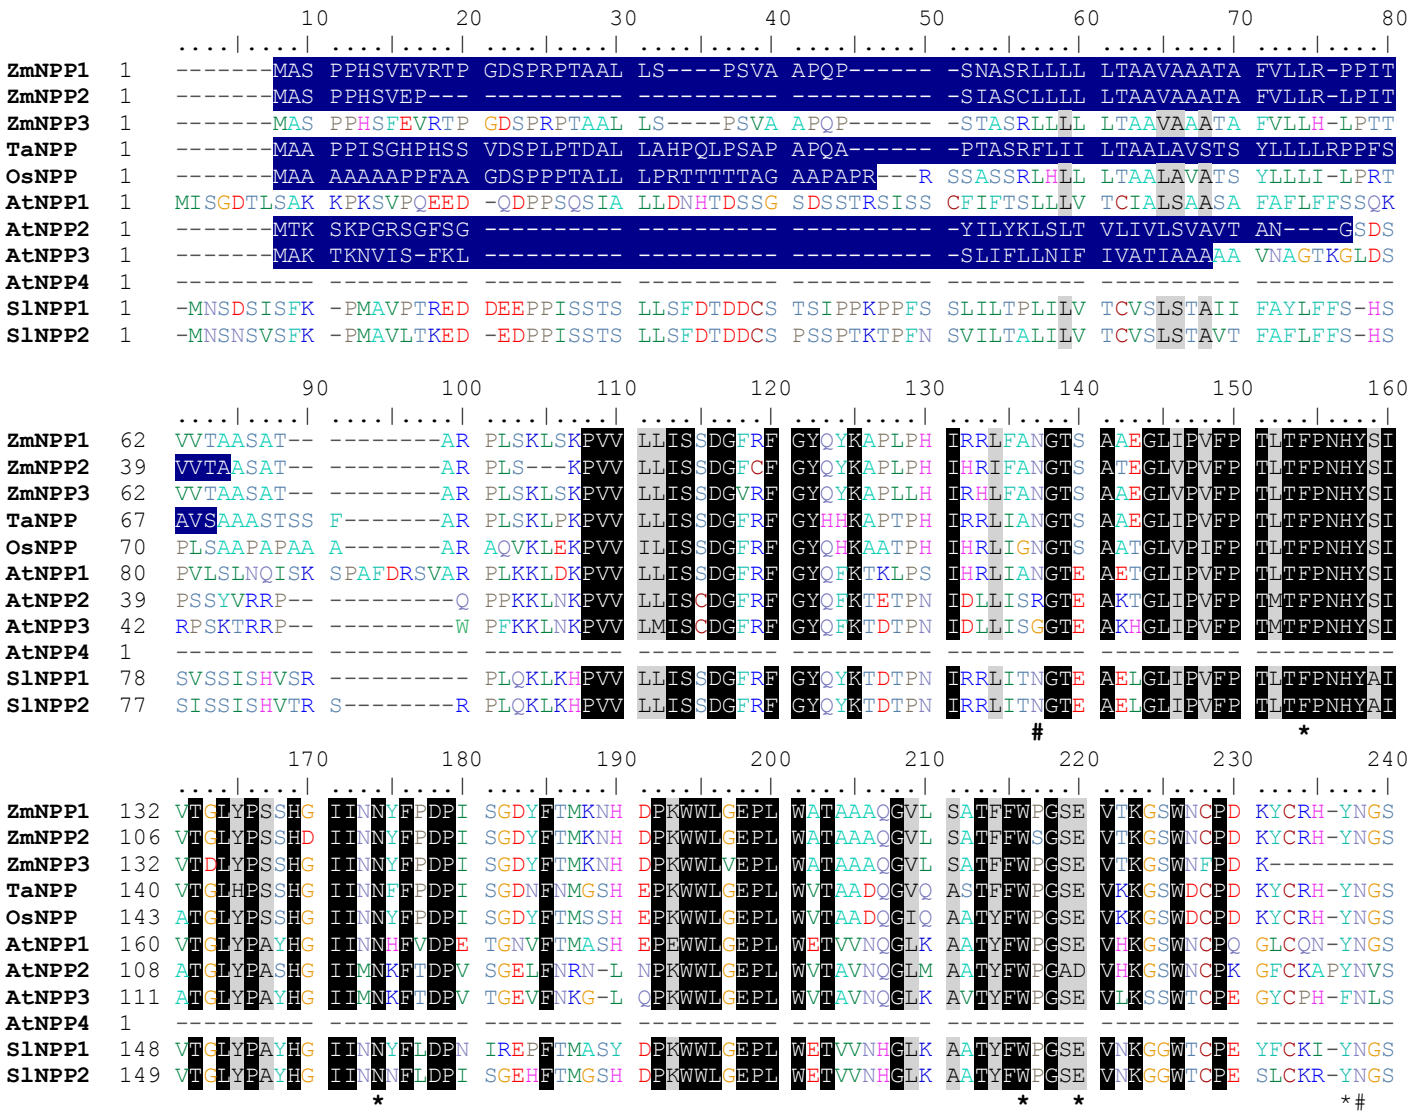

## Zeatin *cis-trans* Isomerase Uncovered

|        |     | 250        | 260        | 270         | 280         | 290         | 300        | 310        | 320         |
|--------|-----|------------|------------|-------------|-------------|-------------|------------|------------|-------------|
| ZmNPP1 | 211 | .... ....  | .... ....  | .... ....   | .... ....   | .... ....   | .... ....  | .... ....  | .... ....   |
| ZmNPP2 | 185 | VPFEERVDTI | LGYFDLPPNQ | MPQFMTLYFE  | DPDHQGHQVG  | PDDPSITDAV  | VHIDEMLGRL | IAGLEARGMF | EDVNIILVGD  |
| ZmNPP3 | 202 | VPFEERVDTI | LGYFDLPPNQ | MPQFMTLYFE  | DPDHQGHQVG  | PDDPSITDAV  | VHIDEMLGRL | IAGLEARGMF | EDVNIILVGD  |
| TaNPP  | 219 | VPFEDRVDV  | LGYFDLPVDE | MPQFLTLYFE  | DPDHQGHQVG  | PDDPSITDAV  | VHIDEMLGRL | IAGLEARGMF | EDVNIILVGD  |
| OsNPP  | 222 | VPFEERVDAI | LGYFDLPSDE | MPQFLTLYFE  | DPDHQGHQVG  | PDDPAITEAV  | VRIDEMIGRL | IAGLEERGVF | EDVNVILVGD  |
| AtNPP1 | 239 | VPFDDRVDTI | LSYFDLPSNE | IPSFMTLYFE  | DPDHQGHQVG  | PDDPQITEAV  | VNIDRLIGRL | IDGLEKRGIF | EDVVTMIMVGD |
| AtNPP2 | 187 | VPLEERVDTI | LNYFDLPERE | IPDFMALLYFE | EPDIQGHEYG  | PDDPRVTEAV  | SKVDKMIGRI | IMGLEKRVKF | SDVHVILLGD  |
| AtNPP3 | 189 | VPLEERVDV  | LSHFHLEDE  | VPDLLMLYFD  | EPDQSGHNYG  | PDDPRVTAV   | SRVDKMIGRV | IKGLKQREIF | DEVHVILLGD  |
| AtNPP4 | 1   | VPFEERVDTV | LNYFDLPNDE | IPSFMTLYFG  | DPDHQGHKVG  | PDDPQITEAI  | ARVDGMIGKL | IQGLEERGVF | EDVNIIMVGD  |
| SlNPP1 | 227 | VPFEERVDTV | LNYFDLPNDE | IPSFMTLYFG  | DPDHQGHKVG  | PDDPQITEAI  | ARVDGMIGKL | IQGLEERGVF | EDVNIIMVGD  |
| SlNPP2 | 228 | VPFEERVDTV | LKYFDLPNDE | IPSFMTLYFE  | DPDHQGHKVG  | PDDPQITEAI  | ARVDGMIGKL | IKGLEARGVF | EDVNIIMVGD  |
|        |     |            |            | *           |             |             |            |            |             |
|        |     | 330        | 340        | 350         | 360         | 370         | 380        | 390        | 400         |
| ZmNPP1 | 291 | HGMVGT--CD | RKLVFLEELA | PWIELKSDWV  | LSVTPELLAIR | PPDGVSP---  | ----AEVVAK | MNEGLGSGKV | KNGEYLKMYL  |
| ZmNPP2 | 206 | HGMVGT--CD | RKLVFLEELA | PWIELKSDWV  | LLMTPELLAIR | SPDGVSP---  | ----TEIVAK | MNEGLGSGKV | KNGEYLKMYL  |
| ZmNPP3 | 248 | HGMVGT--CD | RKLVFLEELA | PWIELKSDWV  | LSMTPELLAIR | PPDGVSP---  | ----DEVVAK | MNEGLGSGKV | KNGEYLKMYL  |
| TaNPP  | 299 | HGMVGT--CD | QKLLFLEELA | PWIEVKADWV  | LSRTPELLAIR | PPDGVSP---  | ----SEVVAK | MNEGLGSGKV | KNGQYLKMYL  |
| OsNPP  | 302 | HGMVGT--CD | KKLVFLDELA | PWIKLEEDWV  | LSMTPELLAIR | PPDMSL---   | ----PDVVAK | MNEGLGSGKV | ENGEYLRMYL  |
| AtNPP1 | 319 | HGMVGT--CD | KKLVVLDLLA | PWIKIPSSWV  | QYVTELLAIQ  | PPSGHDA---  | ----ADIVAK | MNEGLGSGKV | ENGEYLRMYL  |
| AtNPP2 | 267 | HGMVTV--CD | KKVIYIDDLA | DWIKIPADWI  | QDYSPVLAMN  | FRWKGDKVNP  | GQKNAELVRK | MNEALSSGKV | ANGEFLQVYL  |
| AtNPP3 | 269 | HGMVTNCECN | EKAIYIDDLA | DWIKIPAAWI  | QAYSPLVAIN  | PQWKGKVENQ  | SEKNAEVAK  | MNEALSSGKV | KNGEFLKMYL  |
| AtNPP4 | 1   | HGMVGT--CD | KKLVVLDLLA | PWIKIPSSWV  | QYVTELLAIQ  | PPSGHDA---  | ----ADIVAK | MNEGLGSGKV | ENGEYLRMYL  |
| SlNPP1 | 307 | HGMVGT--CD | KKLIFLEELA | RWIKIPKDWI  | QYSYSPVLSIR | PPRSYSA---  | ----KDVVTK | MNEGLKSGKV | KNGQNLKMYL  |
| SlNPP2 | 308 | HGMVGT--CD | RKLVFLEELA | PWIDIPKDWI  | QYSYSPVLSIR | PPPSYSA---  | ----KDVVTK | MNEGLKSEKV | KNGQYLKMYL  |
|        |     | 410        | 420        | 430         | 440         | 450         | 460        | 470        | 480         |
| ZmNPP1 | 362 | KEELPTRLHY | SESYRIPPII | GLVGEQYKIE  | MKRSKRNECG  | GAHGYDNFAFF | SMRTIFAAHG | PRFQGGRTVP | SFENAEIYNV  |
| ZmNPP2 | 277 | KEELPTRLHY | SESYRIPPII | GLVGEQYKIE  | MKRSKRNECG  | GAHGYDNFAFF | SMRTIFVAHG | PRFQGGRTVP | SFENVEIYNV  |
| ZmNPP3 | 319 | KEELPTCLHY | SESYRIPPII | GLVGEQYKIE  | MKRSKRNECG  | GAHGYDNFAFF | SMRTIFATHG | PRFSGW---  | ----        |
| TaNPP  | 370 | KEDLPSRLHY | SESYRIPPII | GLVAEQYKVE  | MKVSKKNECG  | GAHGYDNFAFF | SMRTIFIAHG | PRFEEGKIVP | SFVNVETYNV  |
| OsNPP  | 373 | KEDLPSRLHY | ADSYRIPPII | GLPEEQYKVE  | MKRSKRNECG  | GAHGYDNFAFF | SMRTIFIAHG | PRFEGGRVVP | SFENVEIYNV  |
| AtNPP1 | 390 | KEDLPSRLHY | VDSRIPPII  | GLVDEGFKVE  | QKSKAKECG   | GAHGYDNFAFF | SMRTIFIGHG | PRFSGKGRVP | SFENVQIYNV  |
| AtNPP2 | 345 | KENLPQRLHY | SDSSRIPPII | GMVGEGLMVK  | QNRTYVQECG  | GTHGYDNMFF  | SMRSIFVGYG | PRFRRGKIVP | SFENVQVYNV  |
| AtNPP3 | 349 | KEKLPRLHY  | SESYRIPPII | GIVGEGLMVR  | QNRTNAQVCY  | GTHGYDNFAFF | SMRTIFVGHG | SRFRSGKIVP | SFENVQIYNV  |
| AtNPP4 | 21  | KEKLPDRLHY | SQSYRIPPII | GMVGEGLIVR  | QNRTNAQECY  | GTHGYDNFAFF | SMRTIFVGHG | SRFRSGKIVP | SFENVQIYSV  |
| SlNPP1 | 378 | KEELPDRHY  | SESDRIPPII | GLIDEAFKVE  | QKSKRFECG   | GSHGYDNFAFF | SMRSIFIGHG | PKFARGKIVP | SFENVQIYNV  |
| SlNPP2 | 379 | KEELPDRHY  | SASDRIPPII | GLIDEAFKVE  | QKSKRFECG   | GAHGYDNFAFF | SMRTIFIGHG | PKFASGRKVP | SFENVQIYNV  |
|        |     |            |            | #           |             |             |            |            |             |
|        |     | 490        | 500        | 510         |             |             |            |            |             |
| ZmNPP1 | 442 | MASILNLKPA | PNNGSASFPG | TILLPNK---  | ----        |             |            |            |             |
| ZmNPP2 | 357 | MASILNLKPT | PNNGSASFPG | TILLPNK---  | ----        |             |            |            |             |
| ZmNPP3 | 384 | -----      | -----      | -----       | -----       |             |            |            |             |
| TaNPP  | 450 | IASILSLKPA | PNNGSSSFPE | TVLLPSE---  | ----        |             |            |            |             |
| OsNPP  | 453 | IASILNLEPA | PNNGSSSFPD | TILLPSE---  | ----        |             |            |            |             |
| AtNPP1 | 470 | ISSILGLKAA | PNNGSDEFSS | SILLPRV---  | ----        |             |            |            |             |
| AtNPP2 | 425 | VAEILGLRPA | PNNGSSIFTR | SILLPFGETS  | QVE         |             |            |            |             |
| AtNPP3 | 429 | VAEILGLRPA | PNNGSSIFPR | SILLPSGATR  | EVK         |             |            |            |             |
| AtNPP4 | 101 | VADILGLRPA | PNNGSSIFPR | SILLPFRATR  | GLE         |             |            |            |             |
| SlNPP1 | 458 | VTTILNIQGA | SNNGTSSFPK | TILLPSH---  | ----        |             |            |            |             |
| SlNPP2 | 459 | VTKILNIQGA | PNNGTTFPD  | TILLPSH---  | ----        |             |            |            |             |

## Zeatin *cis-trans* Isomerase Uncovered

**Supplementary Figure S5.** Comparison of *cis*-to-*trans* conversion of zeatin isomers (0.2 mM) in a presence of FAD and FMN. Reactions were set up with or without purified recombinant ZmNPP enzyme and incubated in 100 mM McIlvaine buffer containing 20 mM MgCl<sub>2</sub>, 0.1 mM FAD/FMN, at 37°C under white fluorescent light or in the dark for 20 minutes; determined by UFLC; graph depicts average of three technical replicates with standard deviation.

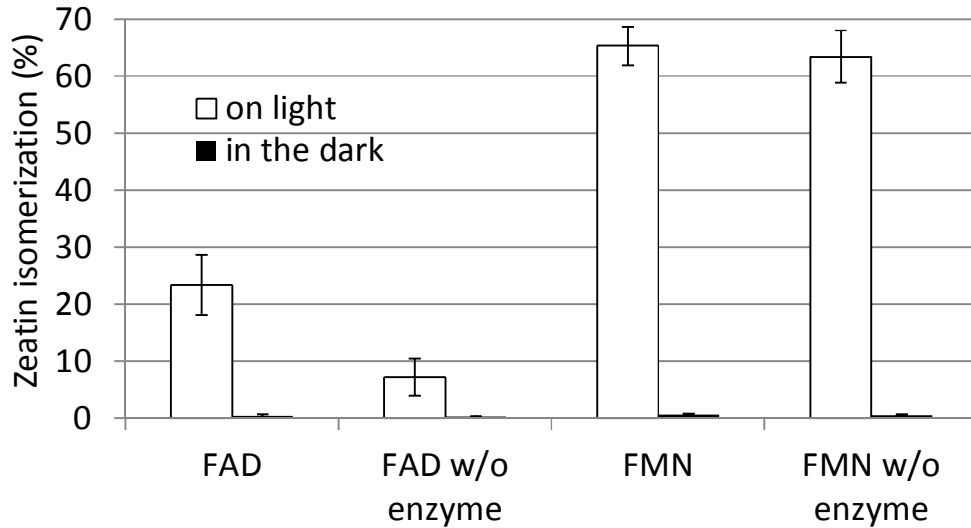

**Supplementary Figure S6.** Level of *trans*-zeatin and *cis*-zeatin in green (A) and senescent (B) leaves of Arabidopsis of wild type or expressing ZmNPP. None of the results was significantly different (Student's t-test;  $p < 0.05$ ;  $n = 4$ ) between the wild type and ZmNPP plants.

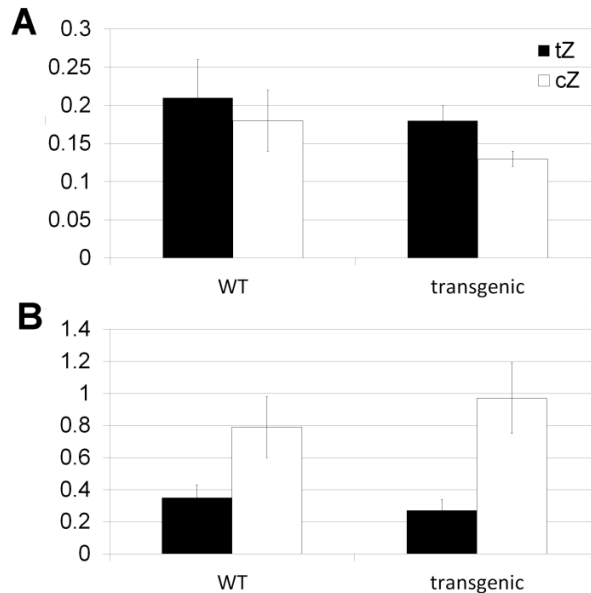

Supplement: Presentation_1.pdf [file Presentation_1.pdf]
